# Supplementary material
Source: PubMed Central journal article supplement (PMC3760031)
Supplement: NIHMS465713-supplement-01.pdf [file NIHMS465713-supplement-01.pdf]

**SUPPLEMENTAL FIGURE 1**

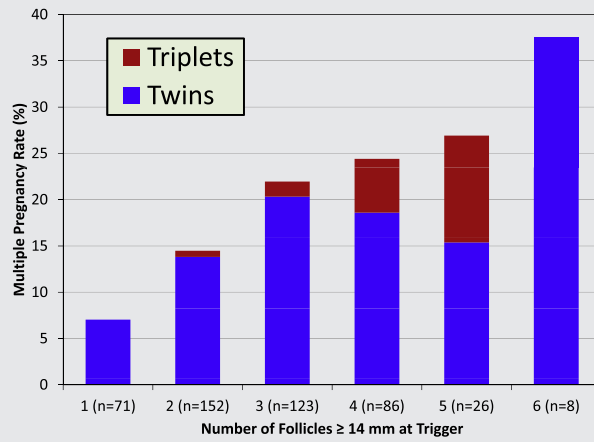

Multiple pregnancy rates (PR) per clinical pregnancy according to the number of mature follicles ( $\geq 14$  mm) at trigger, with sample sizes indicated. Triplets are shown in *red* and twins in *blue*.

*Wolff. Endometrial thickness during IUI. Fertil Steril 2013.*
